# Supplementary material for: Bioluminescent-Inhibition-Based Biosensor for Full-Profile Soil Contamination Assessment
Source: MDPI journal article supplement (doi:10.3390/bios12050353), 2022-05-19
Supplement: s1 [file s1]

## Supplementary Materials 1

Table S1—Profile structure, chemical properties and value of residual luminescence of agricultural soils.

| Horizon index and thickness                                                                                                                              | Sampling depth, cm | Humus . % | pH <sub>KCl</sub> | LHSs, mg C/100g |     |     |      | I/10 | (I/10) av. |
|----------------------------------------------------------------------------------------------------------------------------------------------------------|--------------------|-----------|-------------------|-----------------|-----|-----|------|------|------------|
|                                                                                                                                                          |                    |           |                   | sum             | HA  | FA  | HA:F |      | %          |
|                                                                                                                                                          |                    |           |                   |                 |     |     |      |      |            |
| A                                                                                                                                                        |                    |           |                   |                 |     |     |      |      |            |
| Humus-accumulative order. Clay-illuvial agrochernozem, moderately deep, highly humous, heavy loamy, on clay. Agricultural grassland (perennial grasses). |                    |           |                   |                 |     |     |      |      |            |
| PU. 0-20                                                                                                                                                 | 0-10               | 5.78      | 5.76              | 431             | 242 | 189 | 1.28 | 24.2 | 42.3       |
|                                                                                                                                                          | 10-20              | 5.35      | 5.70              | 388             | 210 | 178 | 1.18 | 29.2 |            |
| AU. 27-43                                                                                                                                                | 27-43              | 4.92      | 5.57              | 336             | 147 | 189 | 0.78 | 35.4 |            |
| ABI. 43-55                                                                                                                                               | 43-55              | 2.47      | 5.35              | 135             | 41  | 94  | 0.44 | 45.5 |            |
| BI. 55-120                                                                                                                                               | 55-75              | 1.52      | 5.06              | 82              | 31  | 51  | 0.61 | 63.7 |            |
|                                                                                                                                                          | 75-120             | 1.09      | 4.47              | 40              | 20  | 20  | 1.00 | 55.7 |            |
| Humus-accumulative order. Agrochernozem, minor soil, highly humous, heavy loamy, on carbonate heavy loam. Ten-year fallow lands.                         |                    |           |                   |                 |     |     |      |      |            |
| AU (PU). 0-26                                                                                                                                            | 0-12               | 6.31      | 5.44              | 304             | 168 | 136 | 1.24 | 36.9 | 67.0       |
|                                                                                                                                                          | 12-26              | 5.99      | 5.64              | 304             | 179 | 125 | 1.43 | 38.0 |            |
| ABI. 26-52                                                                                                                                               | 35-40              | 2.37      | 5.77              | 50              | 25  | 25  | 1.00 | 75.0 |            |
| BCA. 52-140                                                                                                                                              | 70-80              | 0.77      | 7.19              | 19              | 9   | 10  | 0.90 | 85.5 |            |
|                                                                                                                                                          | 115-125            | 0.77      | 7.25              | 19              | 9   | 10  | 0.90 | 99.7 |            |
| Humus-accumulative order. Agrochernozem, minor soil, rich in humus soil, heavy loamy, on carbonate loam. Virgin land.                                    |                    |           |                   |                 |     |     |      |      |            |
| AU. 0-34                                                                                                                                                 | 0-7                | 9.40      | 5.83              | 568             | 348 | 220 | 1.58 | 32.7 | 63.2       |
|                                                                                                                                                          | 15-30              | 7.48      | 5.92              | 283             | 115 | 168 | 0.68 | 56.9 |            |
| ABI. 34-45                                                                                                                                               | 34-45              | 2.26      | 5.52              | 103             | 31  | 72  | 0.43 | 49.7 |            |
| BI. 45-67                                                                                                                                                | 50-65              | 1.62      | 5.62              | 82              | 20  | 62  | 0.32 | 64.2 |            |
| BCA. 67-120                                                                                                                                              | 72-82              | 1.41      | 7.11              | 50              | 10  | 40  | 0.25 | 95.5 |            |
|                                                                                                                                                          | 100-110            | 1.20      | 7.29              | 40              | 10  | 30  | 0.33 | 80.0 |            |
